# Supplementary material
Source: PubMed Central journal article supplement (PMC3739054)
Supplement: NIHMS481635-supplement-01.pdf [file NIHMS481635-supplement-01.pdf]

## SUPPLEMENT FIGURES

**Supplement Figure 1. Microglial but not astrocytic activation was increased by chronic oligomer infusion in rTg4510 mouse brain.** Activated microglia are visualized by CD11b immunofluorescence stain of tissue from saline and OLIGO infused rTg451 mice (A, C), Higher magnification of CD11b positive microglia is shown in panels B and D. Astrocytes are visualized by immunofluorescence stain using GFAP antibody (green) in saline (E) and OLIGO (G) infused rTg4510 mice. Higher magnification of glia markers were presented in panels F and H. DAPI is used to stain nuclei (blue) and is represented by panels I-L. Panels M-P depict the merging the three fluorescent channels. The scale bar represents 10  $\mu\text{m}$  in B, D, F, H, J, L, N and P and 20  $\mu\text{m}$  in A, C, E, G, I, K, M and Q.

**Supplement Figure 2. Stability of oligomeric A $\beta$  within the minipump decreases after 10 days.** 100 $\mu\text{M}$  A $\beta$ 42-derived oligomers were incubated within the osmotic pump in PBS at pH 7.4 and 37 $^{\circ}\text{C}$ . Aliquots were collected 1, 10 or 27 days and subjected to SDS-PAGE and western blot using the 6E10 antibody. Densitometry analysis of the monomer band at 4.5 kDa, low molecular weight species (LMW) ranging from 6-17 kDa, and high molecular weight species (HMW) between 38-180 kDa, were plotted.

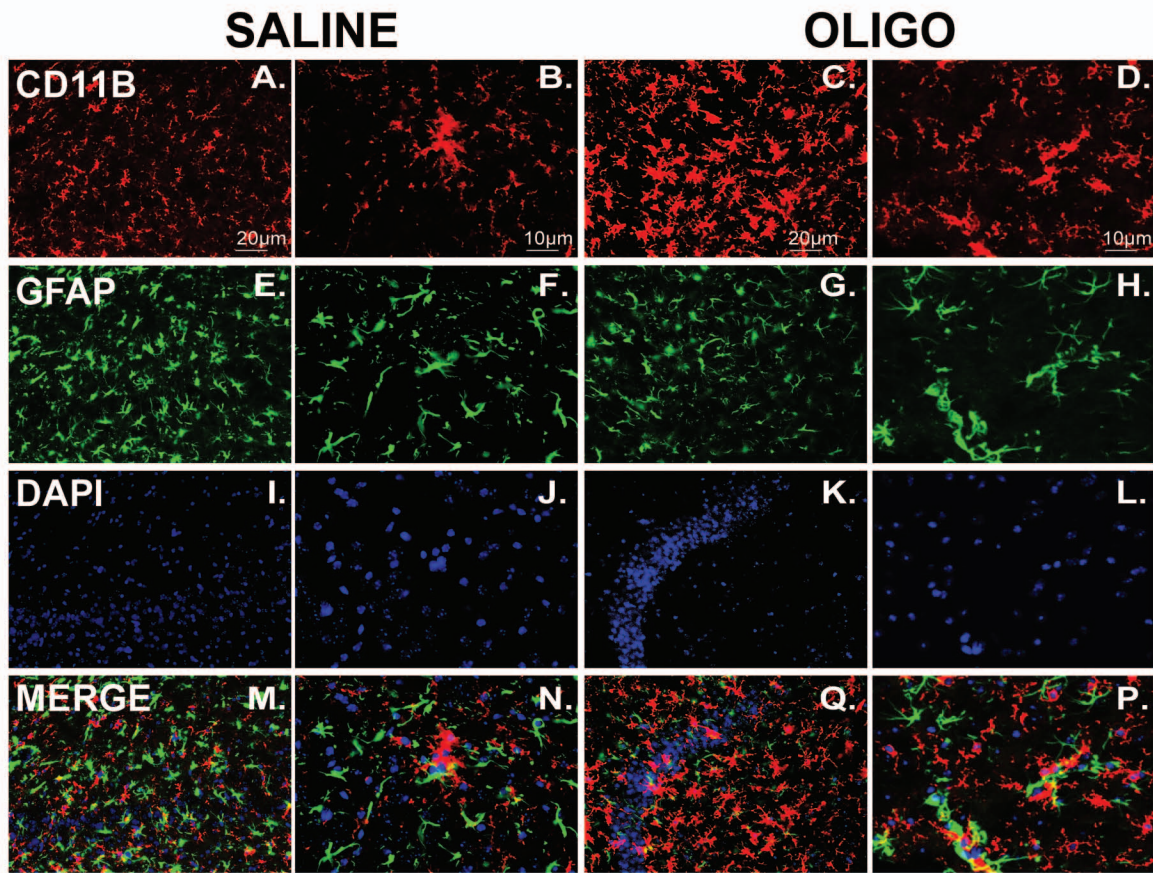

**Selenica et al., Supplement Figure 1**

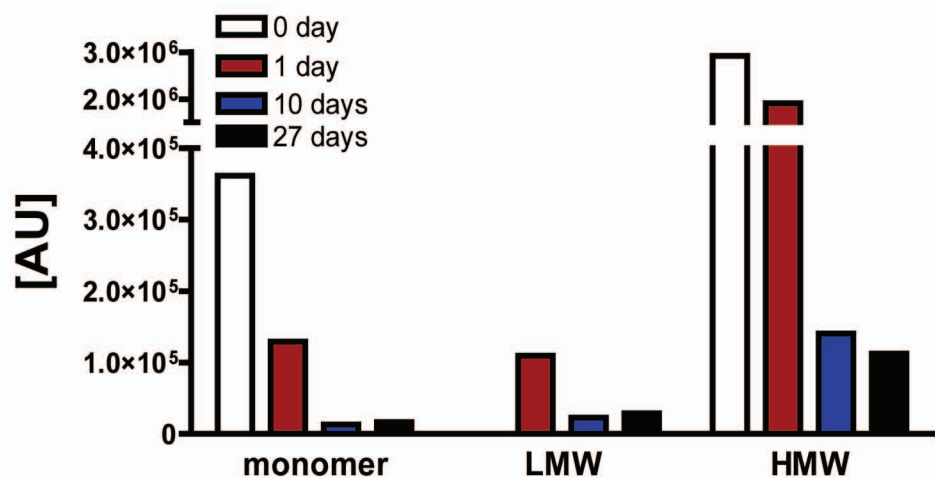

**Selenica et al., Supplement Figure 2**
